# Supplementary material
Source: Springer Nature journal article supplement (https://www.springermedizin.de/resource/supplementary/12985_2010_829_MOESM7_ESM.pdf/9609282)

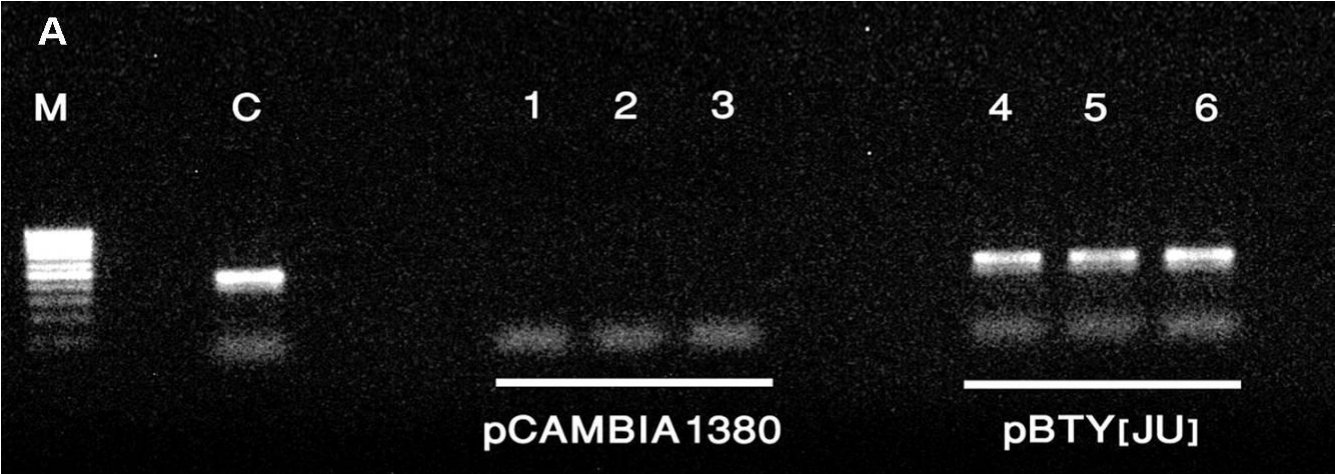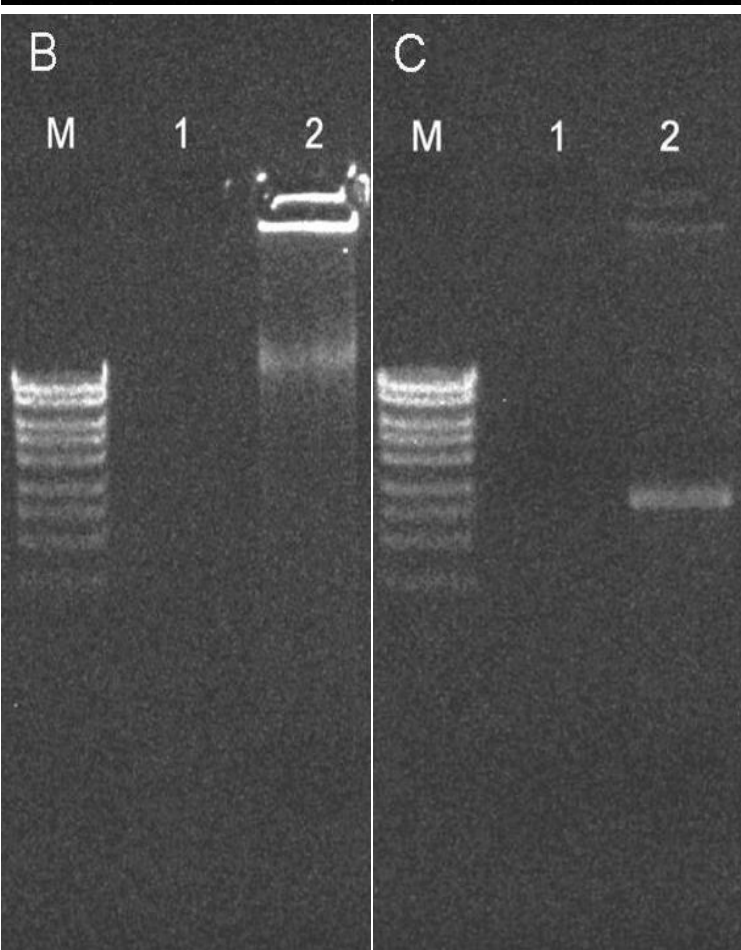

Supplement: MOESM7 [file 9609282]
